# Supplementary material
Source: publisher site journal article supplement (https://www.dovepress.com/article/413581)
Supplement: Supplementary file 1 [file get_supplementary_file.php]

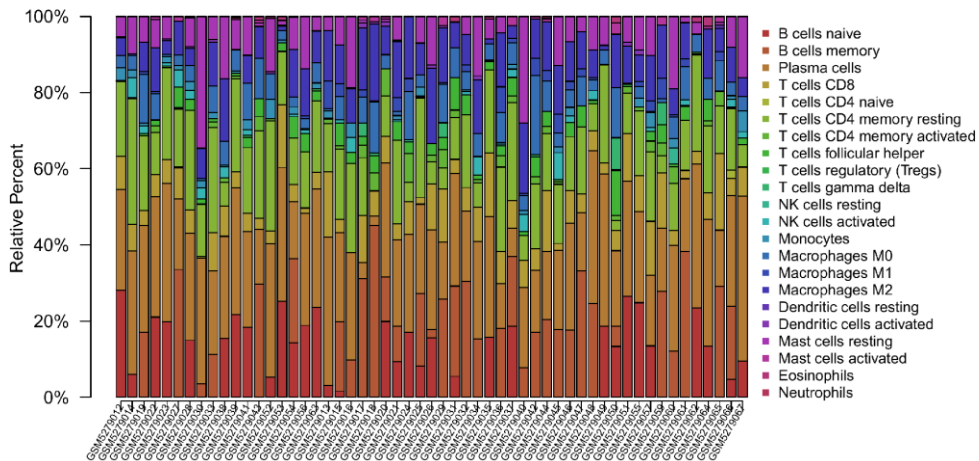

**Supplementary Figure 1** Bar graph quantifies the relative proportions of 22 infiltrated immune cell types in LSGs.

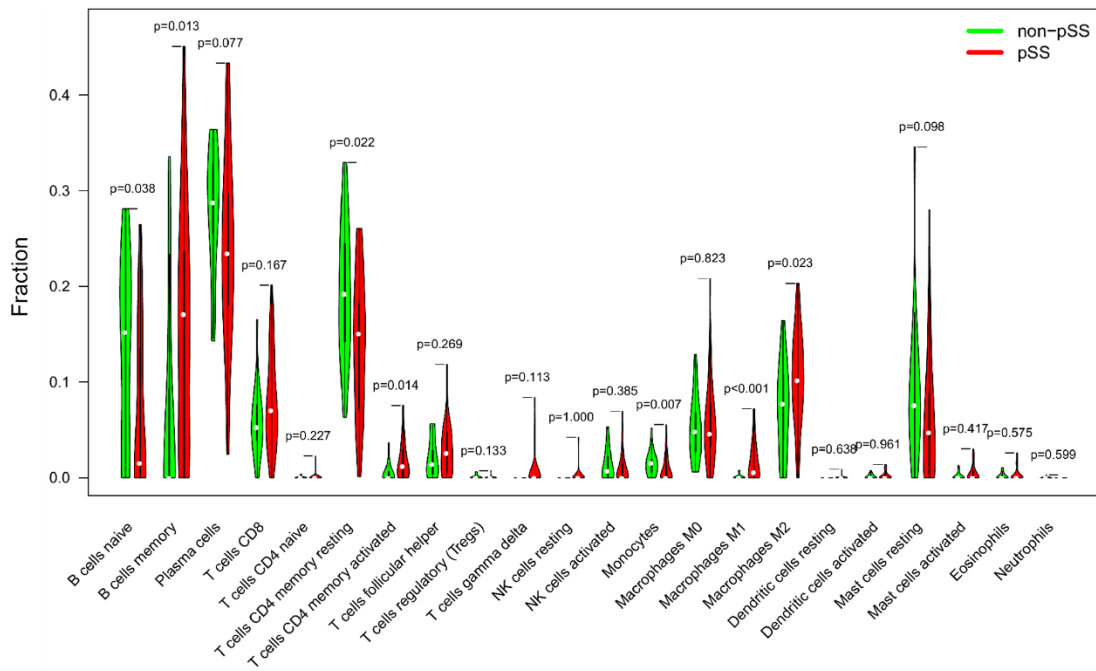

**Supplementary Figure 2** 22 types of immune cells infiltrating the LSG tissue defined by the CIBERSORT algorithm

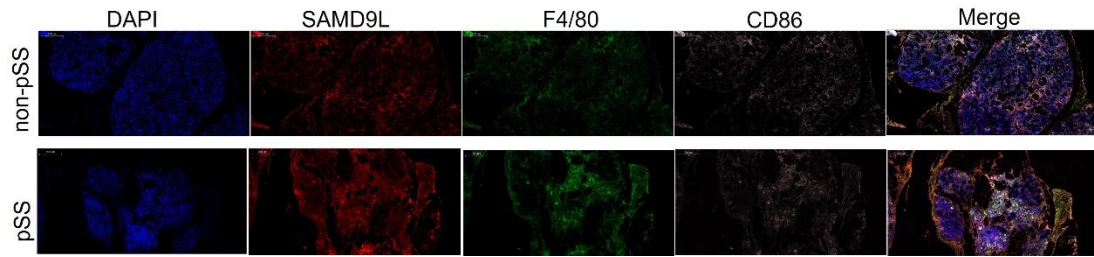

**Supplementary Figure 3 The expression of SAMD9L and macrophages M1 marker in the minor salivary gland of pSS and non-pSS.** Immunofluorescent (IF) staining of SAMD9L (red), macrophages M1 marker F4/80 (green) and CD86 (pink) in labial salivary gland. Nuclei were counterstained with DAPI (blue).

**Supplementary Table 1 Baseline characteristics of pSS and healthy controls who agreed to provide serum samples**

|                | Total     | HC        | pSS       |
|----------------|-----------|-----------|-----------|
| Patients (n)   | 36        | 18        | 18        |
| Female (n [%]) | 36[100]   | 18[100]   | 18[100]   |
| Age (years)    | 49.8±11.0 | 49.6±12.9 | 50.0±8.7  |
| ESSDAI ≥5      | -         | -         | 12[66.67] |

**Abbreviations:** EULAR Sjögren's syndrome disease activity index.

**Supplementary Table 2 Clinical and pathologic characteristics of patients in GSE173808 datasets.**

| Characteristic                 | Total              | Non-pSS            | pSS                |
|--------------------------------|--------------------|--------------------|--------------------|
| Patients(n)                    | 51                 | 18                 | 33                 |
| Age(years)                     | 51.59±13.20        | 50.90±12.18        | 51.96±13.40        |
| Female(n)                      | 50                 | 17                 | 33                 |
|                                | <=4                | 16                 | 19                 |
| ESSDAI(n)                      | 5-13               | 1                  | 9                  |
|                                | >=14               | 1                  | 5                  |
| SSA+(n)                        | 51                 | 1                  | 26                 |
|                                | <1                 | 17                 | 7                  |
| Focus Score                    | 1-1.9              | 1                  | 13                 |
|                                | 2-2.9              | 0                  | 7                  |
|                                | >=3                | 0                  | 6                  |
| LSG CD45 <sup>+</sup> cells(%) | 16.41(7.28-27.63)  | 8.25(3.36-14.84)   | 21.81(15.41-34.68) |
| Rheumatoid Factor+(n)          | 51                 | 0                  | 22                 |
| ICOS                           | 5.75(4.65-7.47)    | 4.65(4.51-5.52)    | 7.18(5.53-7.83)    |
| EPSTI1                         | 9.50(8.79-10.84)   | 8.79(8.50-9.23)    | 10.79(9.16-11.10)  |
| SAMD9L                         | 11.34(10.76-12.12) | 10.77(10.32-11.07) | 12.01(11.14-12.42) |

**Supplementary Table 3 Top 10 DEGs and their inter-group differences in LSG focus score, SSA, RF, and ESSDAI values**

| Gene   | LSG focus score | SSA     | RF      | ESSDAI | SigNum |
|--------|-----------------|---------|---------|--------|--------|
| ICOS   | <0.0001         | 0.0004  | <0.0001 | 0.0395 | 4      |
| EPSTI1 | 0.0003          | <0.0001 | <0.0001 | 0.0375 | 4      |
| SAMD9L | 0.0005          | <0.0001 | <0.0001 | 0.0413 | 4      |
| CXCL10 | <0.0001         | <0.0001 | <0.0001 | 0.1294 | 3      |
| TFEC   | <0.0001         | <0.0001 | <0.0001 | 0.1809 | 3      |
| GBP1   | 0.0005          | <0.0001 | <0.0001 | 0.1401 | 3      |
| SAMD9  | 0.0016          | <0.0001 | <0.0001 | 0.0940 | 3      |
| PARP9  | 0.0167          | <0.0001 | <0.0001 | 0.0952 | 3      |
| TRIM22 | 0.0002          | <0.0001 | <0.0001 | 0.1474 | 3      |
| PARP12 | 0.0129          | 0.0001  | <0.0001 | 0.1302 | 3      |

**Abbreviations:** SSA, anti-SSA antibodies; RF, rheumatoid factor; ESSDAI, EULAR SS disease activity index; SigNum, number of items with statistical significance.

**Supplementary Table 4 AUC test table of predictor variables (combined variables) from our clinical data**

| Variable 1 | Variable 1 | Statistic | <i>P</i> -value |
|------------|------------|-----------|-----------------|
| SAMD9L+RF  | SAMD9L     | 2.078     | 0.038           |
| SAMD9L+RF  | SSA        | 0.625     | 0.532           |
| SAMD9L+RF  | RF         | 1.365     | 0.172           |
| SAMD9L     | SSA        | -0.125    | 0.900           |
| SAMD9L     | RF         | 0.380     | 0.704           |
| SSA        | RF         | 0.555     | 0.579           |

DeLong's test showed that in predicting non-pSS and pSS outcomes, the diagnostic performance of SAMD9L+RF was better than that of SAMD9L, and the result was statistically significant ( $P = 0.038$ ); the diagnostic performance of SAMD9L+RF was better than that of SSA, and the result was not statistically significant ( $P = 0.532$ ); the diagnostic performance of SAMD9L+RF was better than that of RF, and the result was not statistically significant ( $P = 0.172$ ); the diagnostic performance of SAMD9L was worse than that of SSA, and the result was not statistically significant ( $P = 0.900$ ); the

diagnostic performance of SAMD9L was superior to RF, the results were not statistically significant ( $P = 0.704$ ); SSA had better diagnostic performance than RF, and the results were not statistically significant ( $P = 0.579$ ).
